# Supplementary material
Source: Springer Nature journal article supplement (https://www.springermedizin.de/resource/supplementary/12904_2013_178_MOESM1_ESM.pdf/9517706)

## Study measures and time points

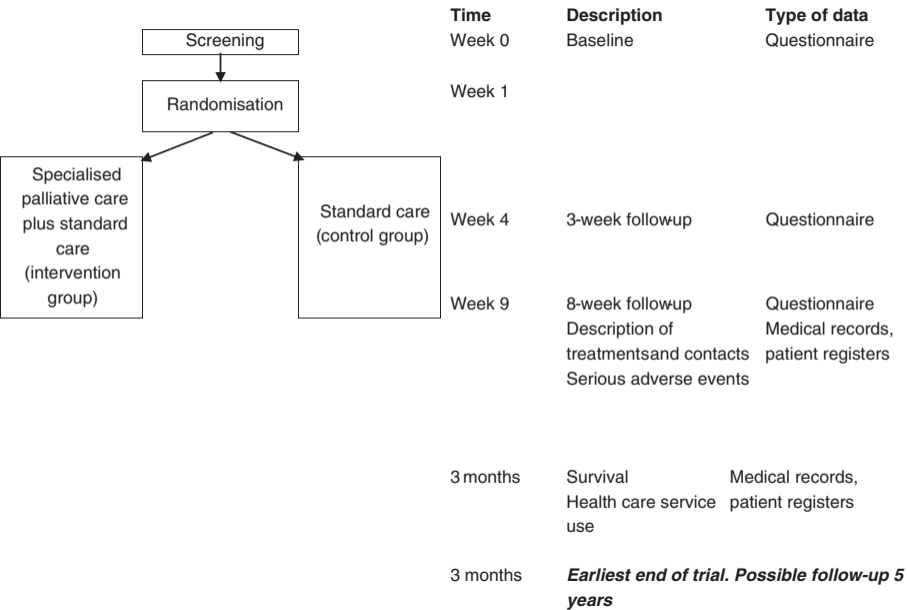

Supplement: MOESM1 [file 9517706]
